# Supplementary material
Source: PubMed Central journal article supplement (PMC3944605)
Supplement: ie4033999_si_001.pdf [file ie4033999_si_001.pdf]

Supporting Information to

**Pure- and Pseudo-Pure Fluid Thermophysical Property  
Evaluation and the Open-Source Thermophysical Property  
Library CoolProp**

Ian H. Bell, Jorrit Wronski, Sylvain Quoilin, Vincent Lemort

*Industrial & Engineering Chemical Research*

## Pure and Pseudo-pure fluids

Table 1 presents a listing of the literature sources for the equations of state and transport properties of the pure- and pseudo-pure fluids implemented in CoolProp. If there is no entry for the isobaric ideal-gas specific heat, it has been provided by the publication for the equation of state.

With respect to the transport properties, if a fluid has a fluid-specific correlation for its viscosity and/or thermal conductivity, this correlation is used. If not, extended corresponding states is employed, using the correction polynomial if available.

Most fluids have fluid-specific correlations for their surface tension. If a fluid does not have a fluid specific surface tension correlation, the correlation of Miqueu et al.<sup>1</sup> is used.

## Incompressible liquids, aqueous solutions and slurries

Table 2 presents a listing of the incompressible liquids implemented in CoolProp that are derived from the properties from Melinder.<sup>2</sup>

Table 3 presents a listing of the high-temperature incompressible liquids that have been implemented in CoolProp based on curve-fits of manufacturer data. The Nitrate Salt Blend NaK is taken from the work of Zavoico.<sup>3</sup>

Table 4 presents a listing of the aqueous solutions and slurries that have been implemented in CoolProp. The abbreviations that begin with the letter M are taken from Melinder<sup>2</sup>, and the others (IceEA, IcePG, IceNA, PK2000, ZiAC) are taken by permission from SecCool, a software package developed by Morten Juel Skovrup of IPU. The aqueous solution of Lithium Bromide in water is modelled according to the equations proposed by Pátek and Klomfar<sup>4</sup>.

**Table 1:** Literature references of the thermophysical property correlations implemented in CoolProp  
EOS: Equation of State

$c_{p,0}$ : Ideal-gas specific heat correlation

$\eta$  : Fluid-specific correlation for viscosity

$\lambda$  : Fluid-specific correlation for thermal conductivity

L-J : Lennard-Jones parameters

ECS : polynomial correction terms for ECS

$\sigma$  : Surface Tension

| Substance          | CAS       | EOS | $c_{p,0}$ | $\eta$ | $\lambda$ | L-J | ECS | $\sigma$ |
|--------------------|-----------|-----|-----------|--------|-----------|-----|-----|----------|
| 1-Butene           | 106-98-9  | 5   |           |        |           |     |     | 6        |
| Acetone            | 67-64-1   | 7   |           |        |           | 8   |     | 6        |
| Air                | N/A       | 9   |           | 10     | 10        |     |     | 6        |
| Ammonia            | 7664-41-7 | 11  |           | 12     | 13        |     |     | 6        |
| Argon              | 7440-37-1 | 14  |           | 10     | 10        |     |     | 6        |
| Benzene            | 71-43-2   | 15  |           |        | 16        | 8   |     | 6        |
| Carbon Dioxide     | 124-38-9  | 17  |           | 18     | 18        |     |     | 6        |
| Carbon Monoxide    | 630-08-0  | 7   |           |        |           | 8   |     | 6        |
| Carbonyl Sulfide   | 463-58-1  | 7   |           |        |           | 8   |     | 6        |
| Cyclohexane        | 110-82-7  | 19  | 20        |        |           | 21  |     | 6        |
| Cyclopropane       | 75-19-4   | 22  | 22        |        |           |     |     |          |
| Cyclopentane       | 287-92-3  | 23  |           |        |           |     |     |          |
| D4                 | 556-67-2  | 24  |           |        |           |     |     | 6        |
| D5                 | 541-02-6  | 24  |           |        |           |     |     | 6        |
| D6                 | 540-97-6  | 25  |           |        |           |     |     | 6        |
| Deuterium          | 7782-39-0 | 26  |           |        |           |     |     | 6        |
| Dimethyl Carbonate | 616-38-6  | 27  |           |        |           |     |     |          |
| Dimethyl Ether     | 115-10-6  | 28  |           | 29     |           | 21  |     | 6        |
| Ethane             | 74-84-0   | 30  |           | 31     | 31        | 31  |     | 6        |
| Ethanol            | 64-17-5   | 32  |           | 33     | 34        | 33  |     | 6        |
| Ethylbenzene       | 100-41-4  | 35  |           |        |           |     |     |          |
| Ethylene           | 74-85-1   | 36  |           |        |           | 8   |     |          |
| Fluorine           | 7782-41-4 | 37  | 37        |        |           |     |     | 6        |
| HFE143a            | 421-14-7  | 38  |           |        |           |     |     |          |
| Helium             | 7440-59-7 | 39  |           | 40     | 41        |     |     | 6        |
| Hydrogen           | 1333-74-0 | 42  |           | 43     | 44        | 8   |     | 6        |
| Hydrogen Sulfide   | 7783-06-4 | 7   |           | 45     |           | 45  |     | 6        |
| Isobutane          | 75-28-5   | 46  |           | 47     | 48        | 47  |     | 6        |
| Isobutene          | 115-11-7  | 5   |           |        |           |     |     | 6        |
| Isohexane          | 107-83-5  | 7   |           |        |           | 21  |     | 6        |
| Isopentane         | 78-78-4   | 7   |           |        |           | 21  |     | 6        |
| Krypton            | 7439-90-9 | 7   |           |        |           | 8   |     | 6        |
| MD2M               | 141-62-8  | 25  |           |        |           |     |     | 6        |
| MD3M               | 141-63-9  | 25  |           |        |           |     |     | 6        |
| MD4M               | 107-52-8  | 24  |           |        |           |     |     | 6        |
| MDM                | 107-51-7  | 25  |           |        |           |     |     | 6        |
| MM                 | 107-46-0  | 24  |           |        |           |     |     | 6        |
| Methane            | 74-82-8   | 49  |           |        |           |     |     | 6        |
| Methanol           | 67-56-1   | 50  |           |        |           |     |     | 6        |
| Methyl Linoleate   | 112-63-0  | 51  |           |        |           |     |     |          |
| Methyl Linolenate  | 301-00-8  | 51  |           |        |           |     |     |          |
| Methyl Oleate      | 112-62-9  | 51  |           |        |           |     |     |          |
| Methyl Palmitate   | 112-39-0  | 51  |           |        |           |     |     |          |

Continued on next page...

| Substance           | CAS        | EOS | $c_{p,0}$ | $\eta$ | $\lambda$ | L-J | ECS | $\sigma$ |
|---------------------|------------|-----|-----------|--------|-----------|-----|-----|----------|
| Methyl Stearate     | 112-61-8   | 51  |           |        |           |     |     |          |
| Neon                | 7440-01-9  | 52  |           |        |           | 8   |     | 6        |
| Neopentane          | 463-82-1   | 7   |           |        |           | 21  |     |          |
| Nitrogen            | 7727-37-9  | 53  |           | 10     | 10        | 8   |     | 6        |
| Nitrous Oxide       | 10024-97-2 | 7   |           |        |           | 8   |     | 6        |
| Ortho-Deuterium     | 7782-39-0o | 26  |           |        |           |     |     |          |
| Ortho-Hydrogen      | 1333-74-0o | 42  |           |        |           |     |     |          |
| Oxygen              | 7782-44-7  | 54  |           | 10     | 10        |     |     | 6        |
| Para-Deuterium      | 7782-39-0p | 26  |           |        |           |     |     |          |
| Para-Hydrogen       | 1333-74-0p | 42  |           |        | 44        |     |     | 6        |
| Propylene           | 115-07-1   | 55  |           |        |           | 56  | 56  | 6        |
| Propyne             | 74-99-7    | 22  | 22        |        |           |     |     |          |
| R11                 | 75-69-4    | 57  | 58        |        |           | 59  |     | 6        |
| R113                | 76-13-1    | 60  |           |        |           |     |     | 6        |
| R114                | 76-14-2    | 61  | 61        |        |           |     |     | 6        |
| R116                | 76-16-4    | 7   |           |        |           | 56  | 56  | 6        |
| R12                 | 75-71-8    | 60  |           |        |           |     |     | 6        |
| R123                | 306-83-2   | 57  | 62        | 63     | 64        | 63  |     | 6        |
| R1234yf             | 754-12-1   | 65  |           |        | 66        |     |     | 6        |
| R1234ze(E)          | 29118-24-9 | 67  |           |        | 66        |     |     |          |
| R1234ze(Z)          | 29118-25-0 | 68  |           |        |           |     |     |          |
| R124                | 2837-89-0  | 69  |           |        |           | 56  | 56  | 6        |
| R125                | 354-33-6   | 70  |           | 71     | 72        | 71  |     | 6        |
| R13                 | 75-72-9    | 61  | 61        |        |           | 56  | 56  | 6        |
| R134a               | 811-97-2   | 73  |           | 56     | 59        | 56  |     | 6        |
| R14                 | 75-73-0    | 61  | 61        |        |           | 56  | 56  | 6        |
| R141b               | 1717-00-6  | 7   |           |        |           | 56  | 56  | 6        |
| R142b               | 75-68-3    | 7   |           |        |           | 56  | 56  | 6        |
| R143a               | 420-46-2   | 74  |           |        |           | 59  |     | 6        |
| R152a               | 75-37-6    | 57  | 75        | 76     | 76        |     |     | 6        |
| R161                | 353-36-6   | 77  |           |        |           |     |     | 6        |
| R21                 | 75-43-4    | 61  | 61        |        |           |     |     | 6        |
| R218                | 76-19-7    | 7   |           |        |           | 56  | 56  | 6        |
| R22                 | 75-45-6    | 78  |           |        |           | 59  | 59  | 6        |
| R227ea              | 431-89-0   | 79  |           |        |           | 56  | 56  | 6        |
| R23                 | 75-46-7    | 80  |           | 81     | 81        | 81  |     | 6        |
| R236ea              | 431-63-0   | 82  |           |        |           | 56  | 56  | 6        |
| R236fa              | 690-39-1   | 83  |           |        |           | 56  | 56  | 6        |
| R245fa              | 460-73-1   | 7   |           |        |           | 56  | 56  | 6        |
| R32                 | 75-10-5    | 84  |           |        |           | 56  | 56  | 6        |
| R365mfc             | 406-58-6   | 79  |           |        |           |     |     | 6        |
| R404A               | N/A        | 85  |           | 86     | 87        |     |     | 88       |
| R407C               | N/A        | 85  |           | 86     | 87        |     |     | 88       |
| R407F               | N/A        |     |           |        |           |     |     |          |
| R41                 | 593-53-3   | 7   |           |        |           | 21  |     | 6        |
| R410A               | N/A        | 85  |           | 86     | 87        |     |     |          |
| R507A               | N/A        | 85  |           | 86     | 87        |     |     |          |
| RC318               | 115-25-3   | 61  | 61        |        |           | 56  | 56  | 6        |
| SES36               | N/A        | 89  |           |        |           |     |     |          |
| Sulfur Dioxide      | 7446-09-5  | 7   |           |        |           | 8   |     | 6        |
| Sulfur Hexafluoride | 2551-62-4  | 90  |           | 91     | 92        | 91  |     | 6        |
| Toluene             | 108-88-3   | 7   |           |        | 93        |     |     | 6        |

Continued on next page...

| Substance      | CAS       | EOS | $c_{p,0}$ | $\eta$ | $\lambda$ | L-J | ECS | $\sigma$ |
|----------------|-----------|-----|-----------|--------|-----------|-----|-----|----------|
| Water          | 7732-18-5 | 94  |           | 95     | 96        | 8   |     | 6        |
| Xenon          | 7440-63-3 | 7   |           |        |           | 8   |     | 6        |
| cis-2-butene   | 590-18-1  | 5   |           |        |           |     |     |          |
| m-Xylene       | 108-38-3  | 35  |           |        |           |     |     |          |
| n-Butane       | 106-97-8  | 46  |           | 97     | 98        | 97  |     | 6        |
| n-Decane       | 124-18-5  | 7   |           | 99     | 100       | 99  |     | 6        |
| n-Dodecane     | 112-40-3  | 101 |           | 102    | 102       | 102 |     | 6        |
| n-Heptane      | 142-82-5  | 19  | 103       |        | 104       | 21  |     | 6        |
| n-Hexane       | 110-54-3  | 19  | 103       | 105    | 106       | 8   |     | 6        |
| n-Nonane       | 111-84-2  | 7   |           | 99     | 100       | 99  |     | 6        |
| n-Octane       | 111-65-9  | 19  | 103       | 99     | 100       | 99  |     | 6        |
| n-Pentane      | 109-66-0  | 19  | 103       |        |           | 8   |     | 6        |
| n-Propane      | 74-98-6   | 107 |           | 108    | 109       | 21  |     | 6        |
| n-Undecane     | 1120-21-4 | 110 |           |        |           |     |     |          |
| o-Xylene       | 95-47-6   | 35  |           |        |           |     |     |          |
| p-Xylene       | 106-42-3  | 35  |           |        |           |     |     |          |
| trans-2-butene | 624-64-6  | 5   |           |        |           |     |     |          |

**Table 2:** Incompressible Liquids from Melinder<sup>2</sup>

| Abbreviation | Description                     |
|--------------|---------------------------------|
| DEB          | Diethyl Benzene                 |
| HFE          | Hydrofluoroether HFE-7100       |
| PMS1         | Polydimethylsiloxan 1.          |
| PMS2         | Polydimethylsiloxan 2.          |
| SAB          | Synthetic alkyl benzene         |
| HCB          | Hydrocarbon blend (Dynalene MV) |
| TCO          | Terpene from citrus oils        |

**Table 3:** High-temperature secondary working fluids with data from manufacturer

| Abbreviation | Description                         |
|--------------|-------------------------------------|
| TD12         | Therminol D12 (-85 to +230°C)       |
| TVP1         | Therminol VP-1 (+12 to +397°C)      |
| T72          | Therminol 72 (-10 to +380°C)        |
| T66          | Therminol 66 (0 to +345°C)          |
| DowJ         | Dowtherm J (-80 to +345°C)          |
| DowQ         | Dowtherm Q (-35 to +360°C)          |
| TX22         | Texatherm 22 (0 to +350°C)          |
| NaK          | Nitrate Salt Blend (+300 to +600°C) |
| XLT          | Syltherm XLT (-100 to +260°C)       |
| HC10         | Dynalene HC-10 (-10 to +218°C)      |
| HC20         | Dynalene HC-20 (-20 to +210°C)      |
| HC30         | Dynalene HC-30 (-30 to +210°C)      |
| HC40         | Dynalene HC-40 (-40 to +200°C)      |
| HC50         | Dynalene HC-50 (-50 to +210°C)      |

**Table 4:** Aqueous solutions and ice slurries

| Abbreviation | Description                                    | max. T | max. mass fraction |
|--------------|------------------------------------------------|--------|--------------------|
| MEG          | Ethylene Glycol ( $C_2H_6O_2$ )                | +100°C | 60 %               |
| MPG          | Propylene Glycol ( $C_3H_8O_2$ )               | +100°C | 60 %               |
| MEA          | Ethyl Alcohol, Ethanol ( $C_2H_6O$ )           | +40°C  | 60 %               |
| MMA          | Methyl Alcohol, Methanol ( $CH_4O$ )           | +40°C  | 60 %               |
| MGL          | Glycerol ( $C_3H_8O_3$ )                       | +40°C  | 60 %               |
| MAM          | Ammonia ( $NH_3$ )                             | +30°C  | 30 %               |
| MKC          | Potassium Carbonate ( $K_2CO_3$ )              | +40°C  | 40 %               |
| MCA          | Calcium Chloride ( $CaCl_2$ )                  | +40°C  | 30 %               |
| MMG          | Magnesium Chloride ( $MgCl_2$ )                | +40°C  | 30 %               |
| MNA          | Sodium Chloride ( $NaCl$ )                     | +40°C  | 23 %               |
| MKA          | Potassium Acetate ( $CH_3CO_2K$ )              | +40°C  | 45 %               |
| MKF          | Potassium Formate ( $CHKO_2$ )                 | +40°C  | 48 %               |
| MLI          | Lithium Chloride ( $LiCl$ )                    | +40°C  | 24 %               |
| ZiAC         | ZitrecAC (corrosion inhibitor)                 | 100°C  | 50 %               |
| IceEA        | Ethanol-water mixture with slurry ice          | -10°C  | 35 %               |
| IcePG        | Propylene glycol-water mixture with slurry ice | -10°C  | 35 %               |
| IceNA        | Sodium chloride-water mixture with slurry ice  | -5°C   | 35 %               |
| PK2000       | Pekasol 2000 (Potassium acetate and formate)   | 100°C  | 100 %              |



## Literature Cited

- (1) Miqueu, C.; Broseta, D.; Satherley, J.; Mendiboure, B.; Lachaise, J.; Graciaa, A. An extended scaled equation for the temperature dependence of the surface tension of pure compounds inferred from an analysis of experimental data. *Fluid Phase Equilibria* **2000**, *172*, 169–182.
- (2) Melinder, Å. *Properties of Secondary Working Fluids for Indirect Systems*; International Institute of Refrigeration, 2010.
- (3) Zavoico, A. *Solar Power Tower Design Basis Document*; 2001.
- (4) Pátek, J.; Klomfar, J. A computationally effective formulation of the thermodynamic properties of LiBr-H<sub>2</sub>O solutions from 273 to 500 K over full composition range. *International Journal of Refrigeration* **2006**, *29*, 566–578.
- (5) Lemmon, E. W.; Ihmels, E. C. Thermodynamic properties of the butenes Part II. Short fundamental equations of state. *Fluid Phase Equilibria* **2005**, *228-229*, 173–187.
- (6) Mulero, A.; Cachadiña, I.; Parra, M. I. Recommended Correlations for the Surface Tension of Common Fluids. *J. Phys. Chem. Ref. Data* **2012**, *41*, 043105–1:13.
- (7) Lemmon, E.; Span, R. Short Fundamental Equations of State for 20 Industrial Fluids. *J. Chem. Eng. Data* **2006**, *51*, 785–850.
- (8) Poling, B. E.; Prausnitz, J. M.; O’Connell, J. P. *The Properties of Gases and Liquids, 5th edition*; McGraw Hill, 2001.
- (9) Lemmon, E.; Jacobsen, R. T.; Penoncello, S. G.; Friend, D. Thermodynamic Properties of Air and Mixtures of Nitrogen, Argon, and Oxygen from 60 to 2000 K at Pressures to 2000 MPa. *J. Phys. Chem. Ref. Data* **2000**, *29*, 331–385.
- (10) Lemmon, E. W.; Jacobsen, R. T. Viscosity and Thermal Conductivity Equations for Nitrogen, Oxygen, Argon, and Air. *International Journal of Thermophysics* **2004**, *25*, 21–69.
- (11) Tillner-Roth, R.; Harms-Watzenberg, F.; Baehr, H. Eine neue Fundamentalgleichung für Ammoniak (A new Fundamental Equation of State for Ammonia). 1993.
- (12) Fenghour, A.; Wakeham, W.; Vesovic, V.; Watson, J.; Millat, J.; Vogel, E. The Viscosity of Ammonia. *J. Phys. Chem. Ref. Data* **1995**, *24*, 1649–1667, 5.
- (13) Tufeu, R.; Ivanov, D.; Garrabos, Y.; Neindre, B. L. Thermal Conductivity of Ammonia in a Large Temperature and Pressure Range Including the Critical Region. *Bericht der Bunsengesellschaft Phys. Chem.* **1984**, *88*, 422–427.
- (14) Tegeler, C.; Span, R.; Wagner, W. A New Equation of State for Argon Covering the Fluid Region for Temperatures From the Melting Line to 700 K at Pressures up to 1000 MPa. *J. Phys. Chem. Ref. Data* **1999**, *28*, 779–850.
- (15) Thol, M.; Lemmon, E.; Span, R. Equation of state for benzene for temperatures from the melting line up to 725 K with pressures up to 500 MPa. *High Temperatures-High Pressures* **2012**, *41*, 81–97.
- (16) Assael, M.; Mihailidou, E.; Huber, M.; Perkins, R. Reference Correlation of the Thermal Conductivity of Benzene from the Triple Point to 725 K and up to 500 MPa. *J. Phys. Chem. Ref. Data* **2012**, *41*, 043102–1:9.
- (17) Span, R.; Wagner, W. A New Equation of State for Carbon Dioxide Covering the Fluid Region from the Triple Point Temperature to 1100 K at Pressures up to 800 MPa. *J. Phys. Chem. Ref. Data* **1996**, *25*, 1509–1596.
- (18) Vesovic, V.; Wakeham, W.; Olchoway, G.; Sengers, J.; Watson, J.; Millat, J. The Transport Properties of Carbon Dioxide. *J. Phys. Chem. Ref. Data* **1990**, *19*, 763–808.

- (19) Span, R.; Wagner, W. Equations of State for Technical Applications. II. Results for Nonpolar Fluids. *International Journal of Thermophysics* **2003**, *24*, 41–109.
- (20) Penoncello, S. G.; Jacobsen, R. T.; Goodwin, A. R. H. A Thermodynamic Property Formulation for Cyclohexane. *Int. J. Thermophys.* **1995**, *16*, 519–531.
- (21) Chichester, J. C.; Huber, M. L. *NISTIR 6650: Documentation and Assessment of the Transport Property Model for Mixtures Implemented in NIST REFPROP (Version 8.0)*; June 2008.
- (22) Polt, A.; Platzler, B.; Maurer, G. Parameter der thermischen Zustandsgleichung von Bender für 14 mehratomige reine Stoffe. *Chem. Technik* **1992**, *22*, 216–224.
- (23) Gedanitz, H.; Dávila, M. J.; Lemmon, E. W. Speed of sound measurements and a fundamental equation of state for cyclopentane. **To be published, preprint provided by Eric Lemmon**,
- (24) Colonna, P.; Nannan, N.; Guardone, A.; Lemmon, E. Multiparameter equations of state for selected siloxanes. *Fluid Phase Equilibria* **2006**, *244*, 193–211.
- (25) Colonna, P.; Nannan, N.; Guardone, A. Multiparameter equations of state for siloxanes:  $[(\text{CH}_3)_3\text{Si-O}_1/2]_2\text{-[O-Si-(CH}_3)_2]_{i=1,\dots,3}$ , and  $[\text{O-Si-(CH}_3)_2]_6$ . *Fluid Phase Equilibria* **2008**, *263*, 115–130.
- (26) Richardson, I.; Leachman, J.; Lemmon, E. Fundamental Equation of State for Deuterium. *J. Phys. Chem Ref. Data* **2013**, *In Press*.
- (27) Zhou, Y.; Wu, J.; Lemmon, E. W. Thermodynamic Properties of Dimethyl Carbonate. *J. Phys. Chem. Ref. Data* **2011**, *40*, 043106–1:11.
- (28) Wu, J.; Zhou, Y.; Lemmon, E. W. An Equation of State for the Thermodynamic Properties of Dimethyl Ether. *J. Phys. Chem. Ref. Data* **2011**, *40*, 023104–1:16.
- (29) Meng, X.; Zhang, J.; Wu, J.; Liu, Z. Experimental Measurement and Modeling of the Viscosity of Dimethyl Ether. *J. Chem. Eng. Data* **2012**, *57*, 988–993.
- (30) Buecker, D.; Wagner, W. A Reference Equation of State for the Thermodynamic Properties of Ethane for Temperatures from the Melting Line to 675 K and Pressures up to 900 MPa. *J. Phys. Chem. Ref. Data* **2006**, *35*, 205–266.
- (31) Friend, D. G.; Ingham, H.; Ely, J. F. Thermophysical Properties of Ethane. *J. Phys. Chem. Ref. Data* **1991**, *20*, 275–347.
- (32) Schroeder, J. A. A New Fundamental Equation for Ethanol. M.Sc. thesis, University of Idaho, 2011.
- (33) Kiselev, S. B.; Ely, J. F.; Abdulgatov, I. M.; Huber, M. L. Generalized SAFT-DFT/DMT Model for the Thermodynamic, Interfacial, and Transport Properties of Associating Fluids: Application for n-Alkanols. *Ind. Eng. Chem. Res.* **2005**, *44*, 6916–6927.
- (34) Assael, M. J.; Sykioti, E. A.; Huber, M. L.; Perkins, R. A. Reference Correlation of the Thermal Conductivity of Ethanol from the Triple Point to 600 K and up to 245 MPa. *J. Phys. Chem Ref. Data* **2013**, *42*, 023102–1:10.
- (35) Zhou, Y.; Wu, J.; Lemmon, E. W. Thermodynamic Properties of o-Xylene, m-Xylene, p-Xylene, and Ethylbenzene. *J. Phys. Chem. Ref. Data* **2012**, *41*, 023103–1 – 023103–26.
- (36) Smukala, J.; Span, R.; Wagner, W. New Equation of State for Ethylene Covering the Fluid Region for Temperatures From the Melting Line to 450 K at Pressures up to 300 MPa. *J. Phys. Chem. Ref. Data* **2000**, *29*, 1053–1121.
- (37) de Reuck, K. *Fluorine: International Thermodynamic Tables of the Fluid State - 11*; Blackwell Scientific Publications, 1990.

- (38) Akasaka, R.; Kayukawa, Y. A fundamental equation of state for trifluoromethyl methyl ether (HFE-143m) and its application to refrigeration cycle analysis. *International Journal of Refrigeration* **2012**, *35*, 1003–1013.
- (39) Ortiz-Vega, D.; Hall, K.; Arp, V.; Lemmon, E. Unpublished - coefficients from REPROP with permission.
- (40) Arp, V.; McCarty, R.; Friend, D. *Thermophysical Properties of Helium-4 from 0.8 to 1500 K with Pressures to 2000 MPa - NIST Technical Note 1334 (revised)*; 1998.
- (41) Hands, B.; Arp, V. A Correlation of Thermal Conductivity Data for Helium. *Cryogenics* **1981**, *21*, 697–703.
- (42) Leachman, J.; Jacobsen, R.; Penoncello, S.; Lemmon, E. Fundamental Equations of State for Parahydrogen, Normal Hydrogen, and Orthohydrogen. *J. Phys. Chem. Ref. Data* **2009**, *38*, 721–748.
- (43) Muzny, C. D.; Huber, M. L.; Kazakov, A. F. Correlation for the Viscosity of Normal Hydrogen Obtained from Symbolic Regression. *J. Chem. Eng. Data* **2013**,
- (44) Assael, M. J.; Assael, J.-A. M.; Huber, M. L.; Perkins, R. A.; Takata, Y. Correlation of the Thermal Conductivity of Normal and Parahydrogen from the Triple Point to 1000 K and up to 100 MPa. *J. Phys. Chem. Ref. Data* **2011**, *40*, 033101–1:13.
- (45) Quiñones-Cisneros, S. E.; Schmidt, K. A. G.; Giri, B. R.; Blais, P.; Marriott, R. A. Reference Correlation for the Viscosity Surface of Hydrogen Sulfide. *J. Chem. Eng. Data* **2012**, *57*, 3014–3018.
- (46) Buecker, D.; Wagner, W. Reference Equations of State for the Thermodynamic Properties of Fluid Phase n-Butane and Isobutane. *J. Phys. Chem. Ref. Data* **2006**, *35*, 929–1019.
- (47) Vogel, E.; Kuechenmeister, C.; Bich, E. Viscosity Correlation for Isobutane over Wide Ranges of the Fluid Region. *Int. J. Thermophys* **2000**, *21*, 343–356.
- (48) Perkins, R. Measurement and Correlation of the Thermal Conductivity of Isobutane from 114 K to 600 K at Pressures to 70 MPa. *J. Chem. Eng. Data* **2002**, *47*, 1272–1279.
- (49) Setzmann, U.; Wagner, W. A New Equation of State and Tables of Thermodynamic Properties for Methane Covering the Range from the Melting Line to 625 K at Pressures up to 1000 MPa. *J. Phys. Chem. Ref. Data* **1991**, *20*, 1061–1151.
- (50) de Reuck, K.; Craven, R. *Methanol: International Thermodynamic Tables of the Fluid State - 12*; Blackwell Scientific Publications, 1993.
- (51) Huber, M. L.; Lemmon, E. W.; Kazakov, A.; Ott, L. S.; Bruno, T. J. Model for the Thermodynamic Properties of a Biodiesel Fuel. *Energy & Fuels* **2009**, *23*, 3790–3797.
- (52) Katti, R.; Jacobsen, R.; Stewart, R.; Jehangiri, M. Thermodynamic Properties of Neon for Temperatures from the Triple Point to 700 K at Pressures to 700 MPa. *Advances in Cryogenic Engineering* **1986**, *31*, 1189–1197.
- (53) Span, R.; Lemmon, E. W.; Jacobsen, R. T.; Wagner, W.; Yokozeki, A. A Reference Equation of State for the Thermodynamic Properties of Nitrogen for Temperatures from 63.151 to 1000 K and Pressures to 2200 MPa. *J. Phys. Chem. Ref. Data* **2000**, *29*, 1361–1433.
- (54) Stewart, R. B.; Jacobsen, R. T.; Wagner, W. Thermodynamic Properties of Oxygen from the Triple Point to 300 K with Pressures to 80 MPa. *J. Phys. Chem. Ref. Data* **1991**, *20*, 917–1021.
- (55) Lemmon, E.; Overhoff, U.; McLinden, M.; Wagner, W. Personal communication with Eric Lemmon.
- (56) Huber, M. L.; Laesecke, A.; Perkins, R. A. Model for the Viscosity and Thermal Conductivity of Refrigerants, Including a New Correlation for the Viscosity of R134a. *Ind. Eng. Chem. Res.* **2003**, *42*, 3163–3178.

- (57) Span, R.; Wagner, W. Equations of State for Technical Applications. III. Results for Polar Fluids. *International Journal of Thermophysics* **2003**, *24*, 111–162.
- (58) Jacobsen, R.; Penoncello, S.; Lemmon, E. A Fundamental Equation for Trichlorofluoromethane (R-11). *Fluid Phase Equilibria* **1992**, *80*, 45–56.
- (59) McLinden, M. O.; Klein, S. A.; Perkins, R. A. An extended corresponding states model for the thermal conductivity of refrigerants and refrigerant mixtures. *Int. J. Refrig.* **2000**, *23*, 43–63.
- (60) Marx, V.; Pruss, A.; Wagner, W. *Neue Zustandsgleichung für R 12, R 22, R 11 und R 113 - Beschreibung des thermodynamischen Zustandsverhaltens bei Temperaturen bis 525 K und Drücken bis 200 MPa*; VDI Verlag, 1992; Vol. 19.
- (61) Platzler, B.; Polt, A.; Maurer, G. *Thermophysical Properties of Refrigerants*; Springer-Verlag, 1990.
- (62) Younglove, B. A. An International Standard Equation of State for the Thermodynamic Properties of Refrigerant 123 (2,2-Dichloro-1,1,1-Trifluoroethane). *J. Phys. Chem Ref. Data* **1994**, *23*, 731–779.
- (63) Tanaka, Y.; Sotani, T. Thermal Conductivity and Viscosity of 2,2-Dichloro-1,1,1-Trifluoroethane (HCFC-123). *International Journal of Thermophysics* **1996**, *17*, 293–328.
- (64) Laesecke, A.; Perkins, R. A.; Howley, J. B. An improved correlation for the thermal conductivity of HCFC123 (2,2-dichloro-1,1,1-trifluoroethane). *Int. J. Refrig.* **1996**, *19*, 231–238.
- (65) Richter, M.; McLinden, M.; Lemmon, E. Thermodynamic Properties of 2,3,3,3-Tetrafluoroprop-1-ene (R1234yf): Vapor Pressure and p-rho-T Measurements and an Equation of State. *J. Chem. Eng. Data* **2011**, *56*, 3254–3264.
- (66) Perkins, R. A.; Huber, M. L. Measurement and Correlation of the Thermal Conductivity of 2,3,3,3-Tetrafluoroprop-1-ene (R1234yf) and trans-1,3,3,3-Tetrafluoropropene (R1234ze(E)). *Journal of Chemical Engineering Data* **2011**, *56*, 4868–4874.
- (67) McLinden, M. O.; Thol, M.; Lemmon, E. W. Thermodynamic Properties of trans-1,3,3,3-tetrafluoropropene [R1234ze(E)]: Measurements of Density and Vapor Pressure and a Comprehensive Equation of State. 2010.
- (68) Akasaka, R.; Higashi, Y.; Koyama, S. A Fundamental Equation of State For Low-GWP Refrigerant HFO-1234ze(Z). 2013.
- (69) de Vries, B.; Tillner-Roth, R.; Baehr, H. Thermodynamic Properties of HCFC 124. 1995.
- (70) Lemmon, E. W.; Jacobsen, R. T. A New Functional Form and New Fitting Techniques for Equations of State with Application to Pentafluoroethane (HFC-125). *J. Phys. Chem. Ref. Data* **2005**, *34*, 69–108.
- (71) Huber, M. L.; Laesecke, A. Correlation for the Viscosity of Pentafluoroethane (R125) from the Triple Point to 500 K at Pressures up to 60 MPa. *Ind. Eng. Chem. Res.* **2006**, *45*, 4447–4453.
- (72) Perkins, R. A.; Huber, M. L. Measurement and Correlation of the Thermal Conductivity of Pentafluoroethane (R125) from 190 K to 512 K at Pressures to 70 MPa. *J. Chem. Eng. Data* **2006**, *51*, 898–904.
- (73) Tillner-Roth, R.; Baehr, H. D. A International Standard Formulation for the Thermodynamic Properties of 1,1,1,2-Tetrafluoroethane (HFC-134a) for Temperatures from 170 K to 455 K and Pressures up to 70 MPa. *J. Phys. Chem. Ref. Data* **1994**, *23*, 657–729.
- (74) Lemmon, E. W.; Jacobsen, R. T. An International Standard Formulation for the Thermodynamic Properties of 1,1,1-Trifluoroethane (HFC-143a) for Temperatures From 161 to 450 K and Pressures to 50 MPa. *J. Phys. Chem. Ref. Data* **2000**, *29*, 521–552.

- (75) Tillner-Roth, R. A Fundamental Equation of State for 1,1-Difluoroethane (HFC-152a). *Int. J. Thermophys.* **1995**, *16*, 91–100.
- (76) Krauss, R.; Weiss, I. V. C.; Edison, T. A.; Sengers, J. V.; Stephan, K. Transport Properties of 1,1-Difluoroethane (R152a). *Int. J. Thermophys.* **1996**, *17*, 731–757.
- (77) Wu, J.; Zhou, Y. An Equation of State for Fluoroethane (R161). *Int J Thermophys* **2012**, *33*, 220–234.
- (78) Kamei, A.; Beyerlein, S. W.; Jacobsen, R. T. Application of Nonlinear Regression in the Development of a Wide Range Formulation for HCFC-22. *International Journal of Thermophysics* **1995**, *16*, 1155–1164.
- (79) McLinden, M.; Lemmon, E. Thermodynamic Properties of R-227ea, R-365mfc, R-115, and R-131I. *J. Chem. Eng. Data* **To be submitted**,
- (80) Penoncello, S. G.; Lemmon, E. W.; Jacobsen, R. T.; Shan, Z. A Fundamental Equation for Trifluoromethane (R-23). *J. Phys. Chem. Ref. Data* **2003**, *32*, 1473–1499.
- (81) Shan, Z.; Penoncello, S. G.; Jacobsen, R. T. A Generalized Model for Viscosity and Thermal Conductivity of Trifluoromethane (R-23). *ASHRAE Transactions* **2000**, DA-00-10-2.
- (82) Rui, X.; Pan, J.; Wang, Y. An equation of state for the thermodynamic properties of 1,1,1,2,3,3-hexafluoropropane (R236ea). *Fluid Phase Equilibria* **2013**, *341*, 78–85.
- (83) Pan, J.; Rui, X.; Zhao, X.; Qiu, L. An equation of state for the thermodynamic properties of 1,1,1,3,3,3-hexafluoropropane (HFC-236fa). *Fluid Phase Equilibria* **2012**, *321*, 10–16.
- (84) Tillner-Roth, R.; Yokozeki, A. An international standard equation of state for difluoromethane (R-32) for temperatures from the triple point at 136.34 K to 435 K and pressures up to 70 MPa. *J. Phys. Chem. Ref. Data* **1997**, *26*, 1273–1328.
- (85) Lemmon, E. Pseudo-Pure Fluid Equations of State for the Refrigerant Blends R-410A, R-404A, R-507A, and R-407C. *Int. J. Thermophys.* **2003**, *24*, 991–1006.
- (86) Geller, V. Viscosity of Mixed Refrigerants R404A, R407C, R410A, and R507A. 2000.
- (87) Geller, V.; Nemzer, B.; Cheremnykh, U. Thermal Conductivity of the Refrigerant mixtures R404A, R407C, R410A, and R507A. *Int. J. Thermophys.* **2001**, *22*, 1034–1043.
- (88) Heide, R. The surface tension of HFC refrigerants and mixtures. *Int J. Refrig.* **1997**, *20*, 496–503.
- (89) Thol, M.; Lemmon, E. W.; Span, R. Unpublished.
- (90) Guder, C.; Wagner, W. A Reference Equation of State for the Thermodynamic Properties of Sulfur Hexafluoride SF<sub>6</sub> for Temperatures from the Melting Line to 625 K and Pressures up to 150 MPa. *J. Phys. Chem. Ref. Data* **2009**, *38*, 33–94.
- (91) Quiñones-Cisneros, S.; Huber, M.; Deiters, U. Correlation for the Viscosity of Sulfur Hexafluoride (SF<sub>6</sub>) from the Triple Point to 1000 K and Pressures to 50 MPa. *Journal of Physical and Chemical Reference Data* **2012**, *41*, 023102–1:11.
- (92) Assael, M. J.; Koini, I. A.; Antoniadis, K. D.; Huber, M. L.; Abdulagatov, I. M.; Perkins, R. A. Reference Correlation of the Thermal Conductivity of Sulfur Hexafluoride from the Triple Point to 1000 K and up to 150 MPa. *Journal of Physical and Chemical Reference Data* **2012**, *41*, 023104–1:9.
- (93) Assael, M. J.; Mylona, S. K.; Huber, M. L.; Perkins, R. A. Reference Correlation of the Thermal Conductivity of Toluene from the Triple Point to 1000 K and up to 1000 MPa. *J. Phys. Chem Ref. Data* **2012**, *41*, 023101–1:12.
- (94) Wagner, W.; Pruss, A. The IAPWS Formulation 1995 for the Thermodynamic Properties of Ordinary Water Substance for General and Scientific Use. *J. Phys. Chem. Ref. Data* **2002**, *31*, 387–535.

- (95) Huber, M.; Perkins, R.; Laesecke, A.; Friend, D.; Sengers, J.; Assael, M.; Metaxa, I.; Vogel, E.; Mareš, R.; Miyagawa, K. New International Formulation for the Viscosity of H<sub>2</sub>O. *J. Phys. Chem. Ref. Data* **2009**, *38*, 101–125.
- (96) Huber, M. L.; Perkins, R. A.; Friend, D. G.; Sengers, J. V.; Assael, M. J.; Metaxa, I. N.; Miyagawa, K.; Hellmann, R.; Vogel, E. New International Formulation for the Thermal Conductivity of H<sub>2</sub>O. *J. Phys. Chem Ref. Data* **2012**, *41*, 033102–1:23.
- (97) Vogel, E.; Kuechenmeister, C.; Bich, E. Viscosity for n-Butane in the Fluid Region. *High Temp. - High Pressures* **1999**, *31*, 173–186.
- (98) Perkins, R.; Ramires, M.; de Castro, C. N.; Cusco, L. Measurement and Correlation of the Thermal Conductivity of Butane from 135 K to 600 K at Pressures to 70 MPa. *J. Chem. Eng. Data* **2002**, *47*, 1263–1271.
- (99) Huber, M. L.; Laesecke, A.; Xiang, H. W. Viscosity correlations for minor constituent fluids in natural gas: n-octane, n-nonane and n-decane. *Fluid Phase Equilibria* **2004**, *224*, 263–270.
- (100) Huber, M.; Perkins, R. Thermal conductivity correlations for minor constituent fluids in natural gas: n-octane, n-nonane and n-decane. *Fluid Phase Equilibria* **2005**, *227*, 47–55.
- (101) Lemmon, E. W.; Huber, M. L. Thermodynamic Properties of n-Dodecane. *Energy & Fuels* **2004**, *18*, 960–967.
- (102) Huber, M. L.; Laesecke, A.; Perkins, R. Transport Properties of n-Dodecane. *Energy & Fuels* **2004**, *18*, 968–975.
- (103) Jaeschke, M.; Schley, P. Ideal-Gas Thermodynamic Properties for Natural-Gas Applications. *Int. J. Thermophys.* **1995**, *16*, 1381–1392.
- (104) Assael, M. J.; Bogdanou, I.; Mylona, S. K.; Huber, M. L.; Perkins, R. A.; Vesovic, V. Reference Correlation of the Thermal Conductivity of n-Heptane from the Triple Point to 600 K and up to 250 MPa. *J. Phys. Chem Ref. Data* **2013**, *42*, 023101–1:9.
- (105) Michailidou, E. K.; Assael, M. J.; Huber, M. L.; Perkins, R. A. Reference Correlation of the Viscosity of n-Hexane from the Triple Point to 600 K and up to 100 MPa. *J. Phys. Chem. Ref. Data* **2013**, *42*, 033104:1–12.
- (106) Assael, M. J.; Mylona, S. K.; Tsiglifi, C. A.; Huber, M. L.; Perkins, R. A. Reference Correlation of the Thermal Conductivity of n-Hexane from the Triple Point to 600 K and up to 500 MPa. *J. Phys. Chem Ref. Data* **2013**, *42*, 013106–1:8.
- (107) Lemmon, E. W.; McLinden, M. O.; Wagner, W. Thermodynamic Properties of Propane. III. A Reference Equation of State for Temperatures from the Melting Line to 650 K and Pressures up to 1000 MPa. *Journal of Chemical Engineering Data* **2009**, *54*, 3141–3180.
- (108) Vogel, E.; Küchenmeister, C.; Bich, E.; Laesecke, A. Reference Correlation of the Viscosity of Propane. *J. Phys. Chem. Ref. Data* **1998**, *27*, 947–970, 5.
- (109) Marsh, K. N.; Perkins, R. A.; Ramires, M. L. V. Measurement and Correlation of the Thermal Conductivity of Propane from 86 K to 600 K at Pressures to 70 MPa. *J. Chem. Eng. Data* **2002**, *47*, 932–940.
- (110) Aleksandrov, I. S.; Gerasimov, A. A.; Grigor’ev, B. A. Using Fundamental Equations of State for Calculating the Thermodynamic Properties of Normal Undecane. *Thermal Engineering* **2011**, *58*, 691–698.
